# Supplementary material
Source: Springer Nature journal article supplement (https://www.springermedizin.de/resource/supplementary/12889_2014_6582_MOESM1_ESM.pdf/9498488)

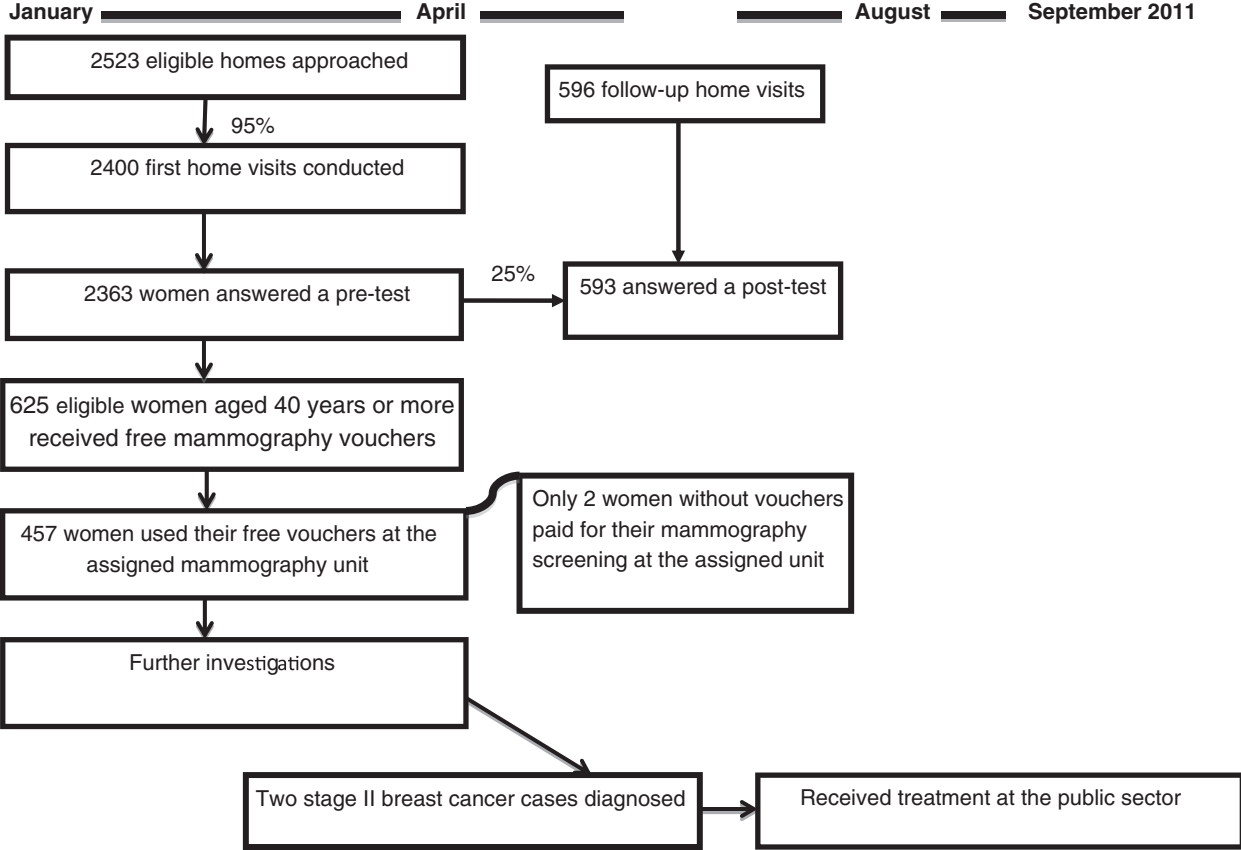

Supplement: MOESM1 [file 9498488]
